# Supplementary material for: Small GTPase ARF6 controls VEGFR2 trafficking and signaling in diabetic retinopathy
Source: JCI journal article supplement (doi:10.1172/jci91770), 2017-10-23
Supplement: sd1 [file 1]

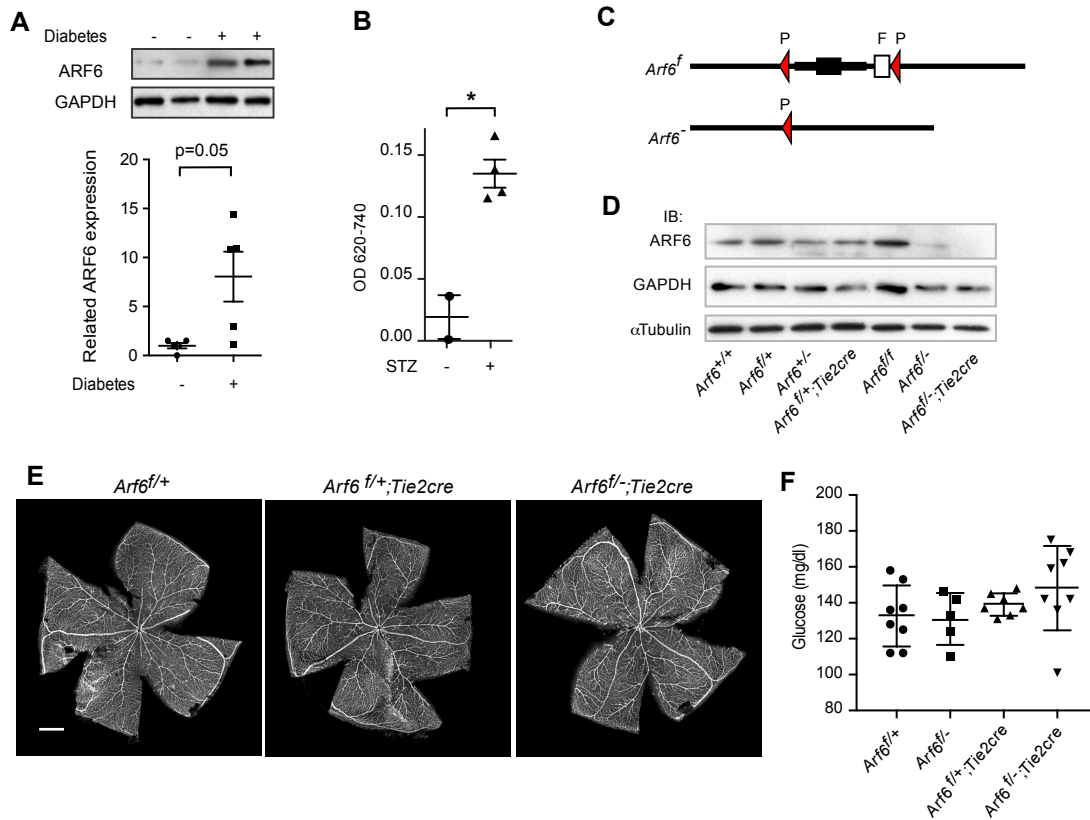

**Supplemental Figure 1. Generation and validation of *Arf6* endothelial knockout mice.** (A) Eye lysates from diabetic human patients immunoblotted for ARF6. The average age of diabetic group is  $74.60 \pm 9.099$  and control group is  $68.00 \pm 17.79$  (there is no significant difference in age between the two groups). (B) Evans blue permeability in mice treated with saline or STZ. (C) Schematic of modified *Arf6* alleles. (D) Validation of *Arf6* knockout from lysates of aortic endothelial cells. (E) Retinal vessels of *Arf6* knockout mice and other genotypes as well (8 weeks). Scale bar = 500  $\mu$ m. (G) Blood glucose levels of *Arf6<sup>f/-</sup>; Tie2cre* mice and their siblings. In panel A (n=5), an unpaired Welch's t-test (two-tailed) was used to assess statistical significance. In panel B (n=2 or 4), a Student's t-test (two-tailed) was used to assess statistical significance; \*p<0.05. Error bars represent SEM.

**A**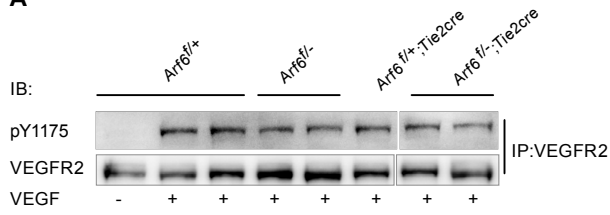**B**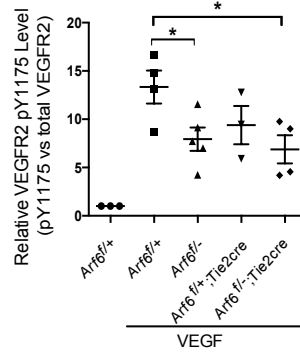**C**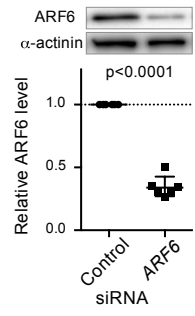**D**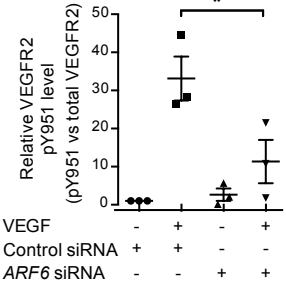**E**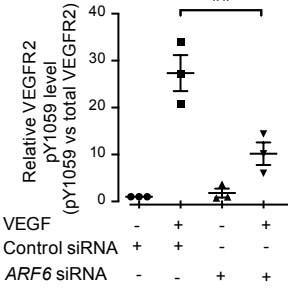**F**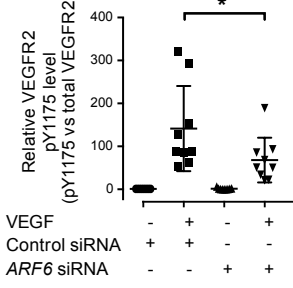**G**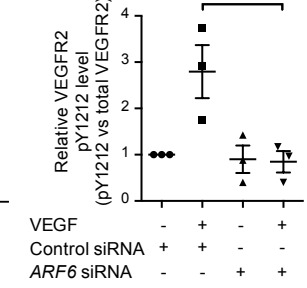**H**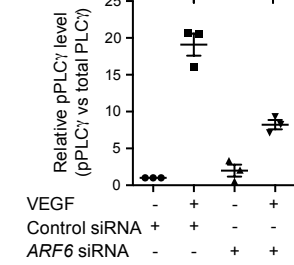**I**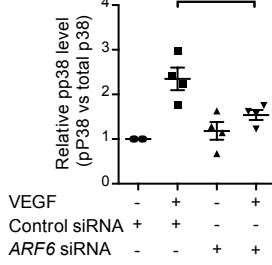**J**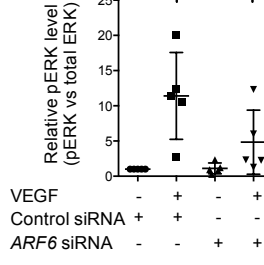**K**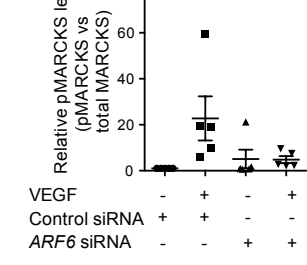**L**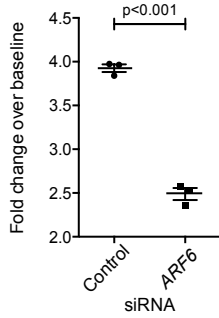**M**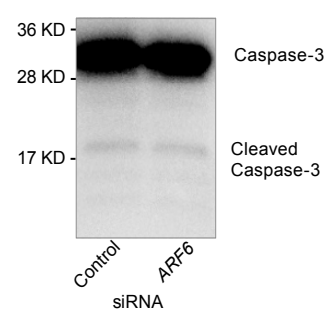

**Supplemental Figure 2. Supporting data and quantification of immunoblots in Figure 2.** (A,B) *Arf6*<sup>-/-</sup>; *Tie2cre* mice and their siblings were give VEGF through the tail vein for 1 min and two eyes from each mouse were harvested and pooled. VEGFR2 was immunoprecipitated, and the precipitate was immunoblotted using antibodies for pVEGFR2 (Y1175). In panel A, groupings of images are different parts of the same gel. (C) Cell lysates from HRECs transfected with control siRNA or *ARF6* siRNA immunoblotted with anti-ARF6 antibody to confirm knockdown. (D-G) Quantification of immunoblots represented in Figure 2A. (H-K) Quantification of immunoblots represented in Figure 2B. (L) HRECs transfected with control siRNA or *ARF6* siRNA were assayed for proliferation. (M) Cell lysates from HRECs transfected with control siRNA or *ARF6* siRNA immunoblotted with anti-Caspase-3 antibody to detect cell apoptosis. In panels B ( $n \geq 3$ ) and D-K ( $n=3$  to  $n=9$ ), one-way ANOVA with Dunnett's multiple comparisons tests was used to assess statistical significance; error bars represent SEM; \* $p < 0.05$ , \*\* $p < 0.01$ , \*\*\*\* $p < 0.0001$ . In panel C ( $n=6$ ), geometric means and 95% confidence intervals (error bars) of the ratios were plotted on a logarithmic scale. Statistical significance was assessed using the ratio paired t test (two-tailed) on non-normalized data, and the p values are shown in the graph. In panel L ( $n=3$ ), a Student's t-test (two-tailed) was used to assess statistical significance; error bars represent SEM.

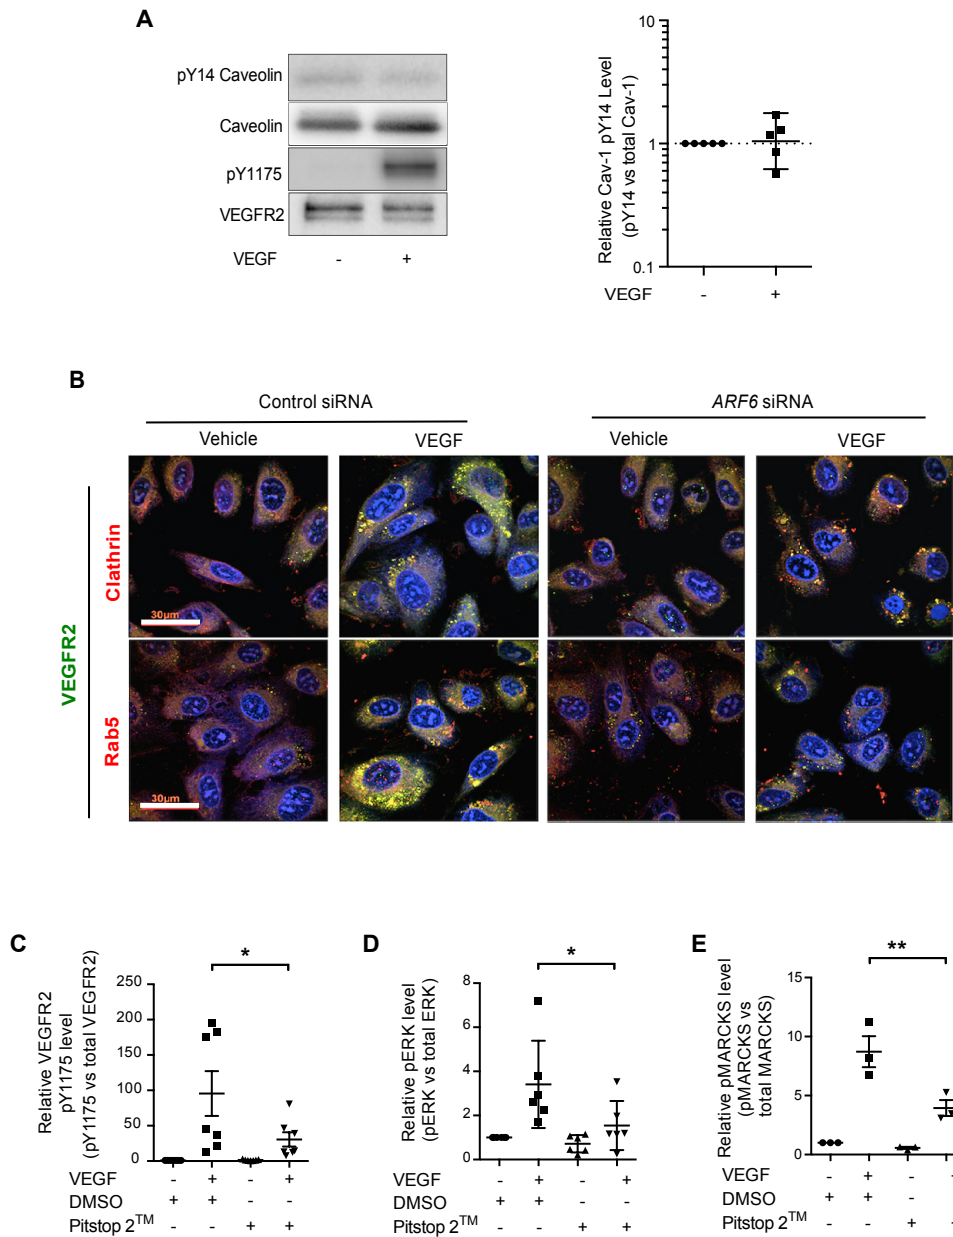

**Supplemental Figure 3. Supporting data and quantification of immunoblots in Figure 3.** (A) Cell lysates from HRECs treated with VEGF and immunoblotted for pY14 Caveolin or Caveolin. Phosphorylation of VEGFR2 at Y1175 was used as a control to confirm VEGF is functioning in the assay. (B) ARF6 siRNA- or Control siRNA-treated HRECs were stimulated with VEGF for 5 min and assayed for co-localization of internalized VEGFR2 with Clathrin and Rab5 (scar bar: 30  $\mu$ m; Original magnification,  $\times$ 1,200). The bottom row of panel B shows the Z-stacked images for Figure 3C. (C-E) Quantification of immunoblots represented in Figure 3D. In panel A (n=5), geometric means and 95% confidence intervals (error bars) of the ratios were plotted on a logarithmic scale. The differences were not significant using a ratio paired t test (two-tailed) on non-normalized data. In panel C-E (n=3 to n=7), one-way ANOVA with Dunnett's multiple comparisons test was used to assess statistical significance; error bars represent SEM; \*p<0.05, \*\*p<0.01

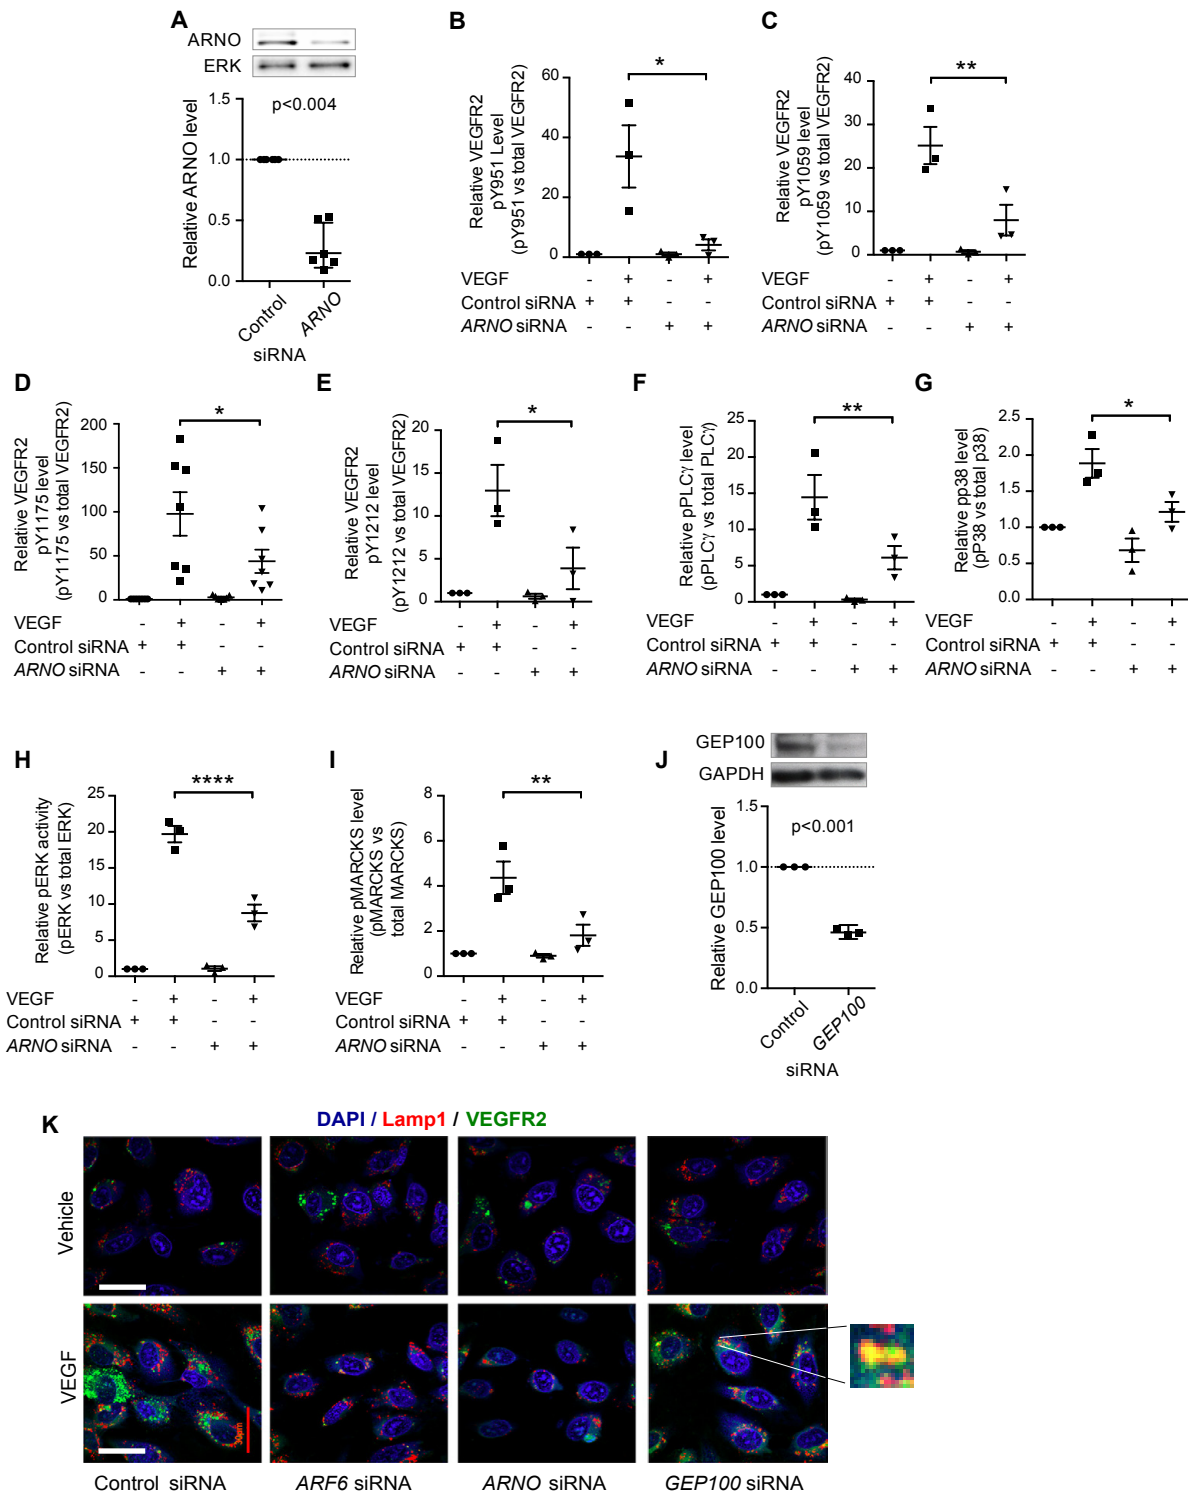

**Supplemental Figure 4. Supporting data and quantification of immunoblots in Figure 4 and 5.** (A) Cell lysates from HRECs transfected with control siRNA or ARNO siRNA immunoblotted with anti-ARNO antibody to confirm knockdown. (B-E) Quantification of immunoblots represented in Fig. 4C. (F-I) Quantification of immunoblots represented in Fig. 4D. (J) Cell lysates from HRECs transfected with control siRNA or GEP100 siRNA immunoblotted with anti-GEP100 antibody to confirm knockdown. (K) The Z-stacked image for Figure 5F (scar bar: 30  $\mu$ m; Original magnification,  $\times 1,200$  and additional  $\times 7$  (inset). In panels A (n=6) and J (n=3), geometric means and 95% confidence intervals (error bars) of the ratios were plotted. Statistical significance was assessed using the ratio paired t test (two-tailed) on non-normalized data, and the p value is shown in the graph. In panel B-I (n=3 or 7), one-way ANOVA with Dunnett's multiple comparisons test was used to assess statistical significance; error bars represent SEM; \* $p < 0.05$ , \*\* $p < 0.01$ , \*\*\*\* $p < 0.0001$ .

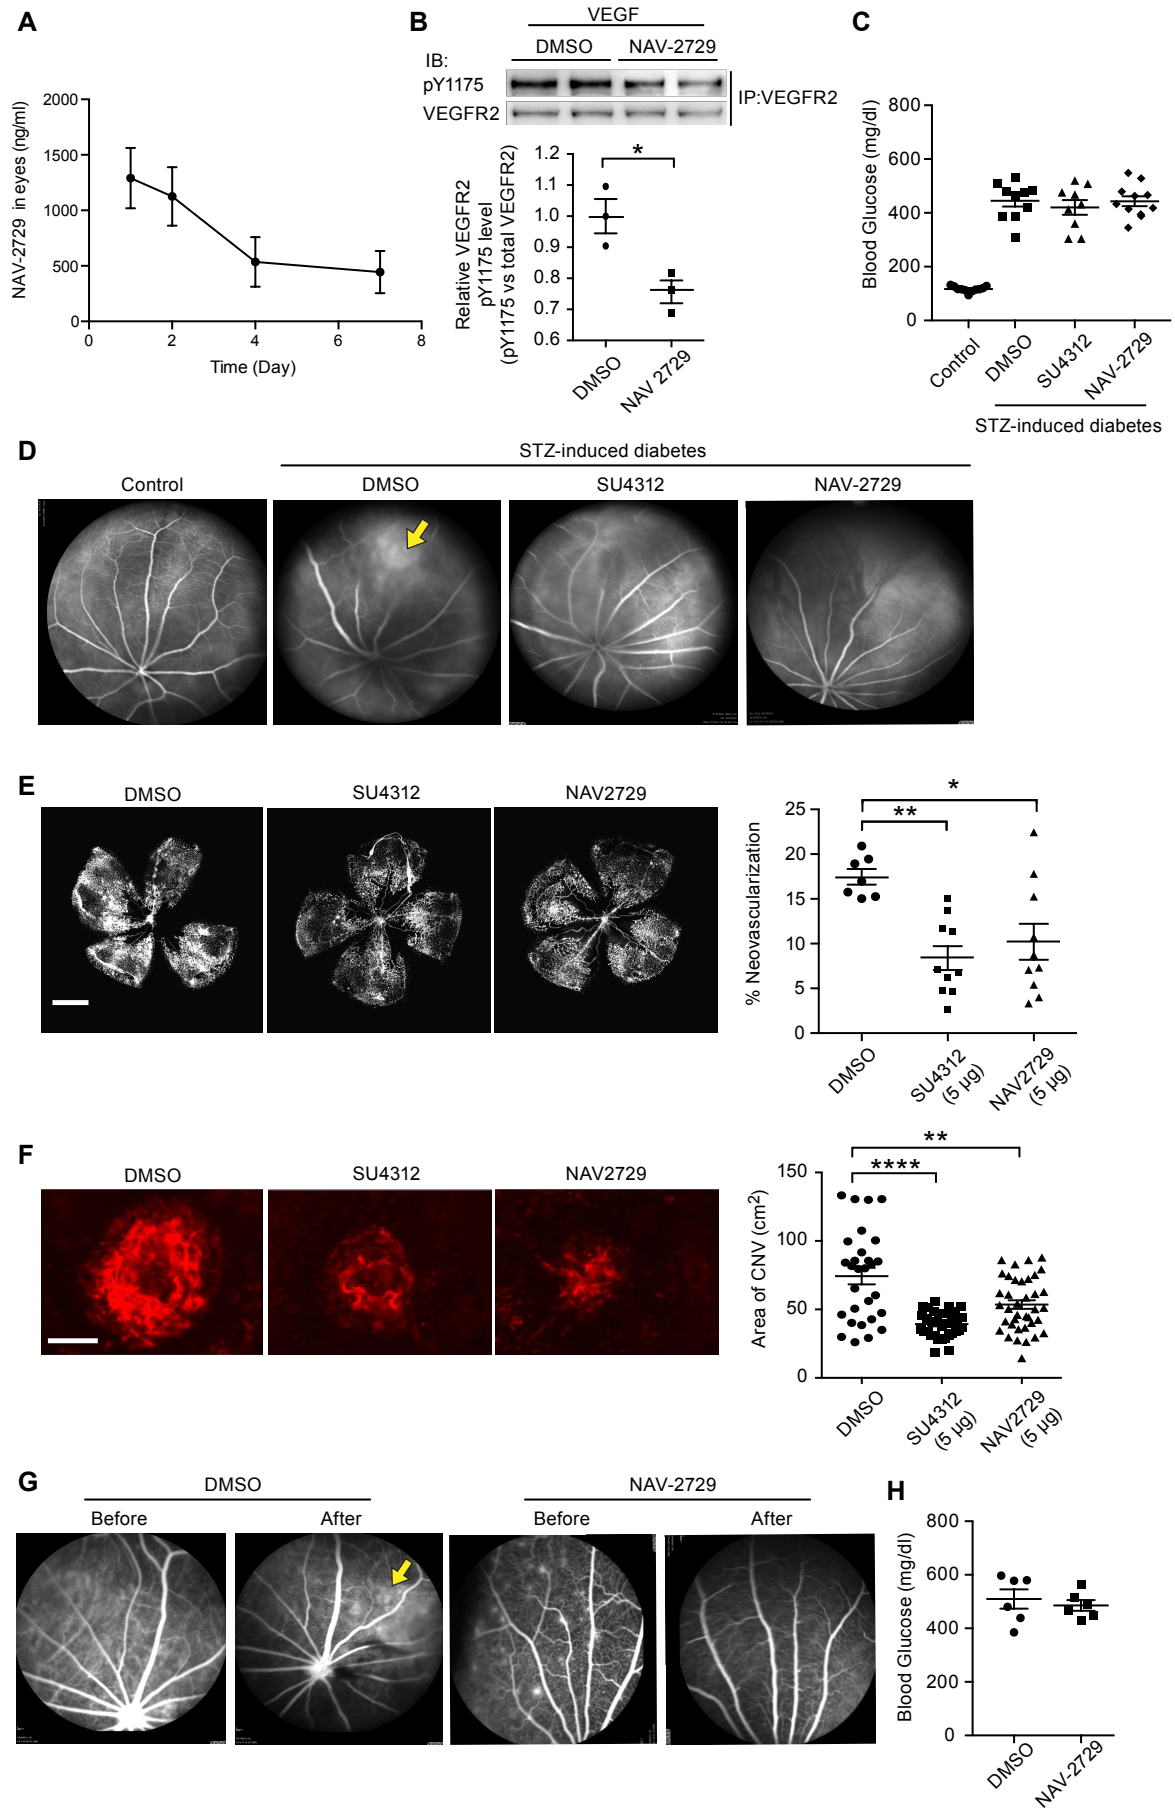

**Supplemental Figure 5. Supporting data for Figure 7.** (A) 50 ng of NAV-2729 was injected into each eye of a mouse and both eyes were harvested and pooled for pharmacokinetic analysis. (B) NAV-2729 was injected into each mouse eye 30 min before injecting the tail vein with VEGF. Eyes from each mouse were harvested 1 min after VEGF injection, and pooled. VEGFR2 was immunoprecipitated, and the precipitate was immunoblotted using antibodies for pVEGFR2 (Y1175). (C) Blood glucose levels of mice used for Figure 7D. (D) Fluorescein angiography was performed in SU4312- or NAV-2729-treated and untreated diabetic mice. (E) Retinal flat mounts were prepared from neonatal mice subjected to OIR, stained with fluorescent isolectin and analyzed by fluorescence microscopy. Scale bar: 1000  $\mu\text{m}$ . (F) Mice were subjected to laser-induced choroidal neovascularization. Choroidal flat mounts were prepared, stained with fluorescent isolectin and analyzed by confocal microscopy. Scale bar: 100  $\mu\text{m}$ . (G) Fluorescein angiography was performed in NAV-2729-treated and untreated diabetic rats. Eyes from same animal before and after different treatment with DMSO or NAV-2729 were represented. (H) Blood glucose levels of rats used for Figure 7E-7G. In panel B (n=3), a Student's t-test (two-tailed) was used to assess statistical significance; \*p<0.05. In Panel E (n>7) and F (n>29) one-way ANOVA with Dunnett's multiple comparisons tests was used to assess statistical significance; \*p<0.05, \*\*p<0.01, \*\*\*\*p<0.0001. Error bars represent SEM.

**Supplemental Table 1. Patient Information**

| Patient          | Number of eyes used in study | Age | Sex    | PMH                                                                                                                                                                                                                                                                                                                                                                                                             | Ocular Hx                           | Diabetes Dx | Cause of Death           |
|------------------|------------------------------|-----|--------|-----------------------------------------------------------------------------------------------------------------------------------------------------------------------------------------------------------------------------------------------------------------------------------------------------------------------------------------------------------------------------------------------------------------|-------------------------------------|-------------|--------------------------|
| 14-0620-101, 201 | 2                            | 60  | Female | Parkinson's disease, Alzheimer's disease, rapid progressing with dementia with Lewy bodies, depression, anxiety, osteoarthritis, hypothyroidism, hysterectomy.                                                                                                                                                                                                                                                  | None                                | No          | Aspiration               |
| 14-0580-101      | 1                            | 47  | Female | Chronic back pain, metastatic breast cancer, tobacco use.                                                                                                                                                                                                                                                                                                                                                       | None                                | No          | Metastatic breast cancer |
| 14-0213-101      | 1                            | 84  | Female | a-fib, HTN, peripheral neuropathy, chronic back problems, cholecystectomy, hysterectomy, spinal fusion, R total hip replacement, rheumatic fever                                                                                                                                                                                                                                                                | None                                | No          | Respiratory NOS          |
| 13-1193-101      | 1                            | 89  | Female | Dementia as well as poor hearing, coronary artery disease, hypothyroidism, HTN, and hyperlipidemia.                                                                                                                                                                                                                                                                                                             | Bilateral cataract surgery          | No          | Myocardial Infarction    |
| 14-0610-101,201  | 2                            | 72  | Male   | Multiple pulmonary emboli, diabetes, cerebral palsy with left side weakness, asthma, hypertension, cerebral vascular accident, osteoarthritis, obesity, colonic polyp, degenerative arthritis, type IV hyperlipoproteinemia, dementia, asthma, tonsillectomy, appendectomy.                                                                                                                                     | Diabetic retinopathy, cataracts     | Yes         | Pulmonary Embolism       |
| 14-0582-101      | 1                            | 62  | Female | HTN, depression, knee surgery, hernia surgery, COPD, DM, CHF- d/t Fen- Phen, bladder surgery, appendix, smoker.                                                                                                                                                                                                                                                                                                 | Lasik surgery                       | Yes         | Pneumonia                |
| 14-0039-101      | 1                            | 83  | Male   | A-fib, coronary artery disease, congestive heart failure, hyperlipidemia, bladder cancer, transitional cell carcinoma, muscle invasive cancer, herniated disk, degenerative joint disease, type 2 diabetes, kidney infection, pilonidal cyst removed from tailbone, stoma with subsequent surgeries.                                                                                                            | Bilateral cataract surgery          | Yes         | Sudden cardiac event     |
| 14-0237-101      | 1                            | 84  | Female | DM, reactive airway disease, Rheumatoid arthritis, arterial HTN, dyslipidemia, GERD, CAD, CHF, paroxysmal atrial fibrillation, RLS, total right knee arthroplasty, pacemaker placement, peripheral arterial disease, atherosclerotic cardiovascular disease, superior rectus muscle resection both sides, hysterectomy, cholecystectomy, appendectomy, carotid artery stents, osteoarthritis, cervicalgia, RLS. | Intraocular lens implant, bilateral | Yes         | Sepsis                   |

**Supplemental Table 2. Urine test by Urine Reagent Panel Strips (IVD grade)**

|                             | <i>Arf6<sup>f/+</sup></i> | <i>Arf6<sup>f/+</sup>;Tie2cre</i> | <i>Arf6<sup>f/-</sup>;Tie2cre</i> | <i>Normal range<br/>in mice</i> |
|-----------------------------|---------------------------|-----------------------------------|-----------------------------------|---------------------------------|
| <b>Leukocyte</b>            | (-)                       | (-)                               | (-)                               | (-)                             |
| <b>Nitrite</b>              | (-)                       | (-)                               | (-)                               | (-)                             |
| <b>Urobilinogen (mg/dl)</b> | 0.2 ± 0.0                 | 0.2 ± 0.0                         | 0.2 ± 0.0                         | 0.2 ~ 1.0                       |
| <b>pH</b>                   | 5.7 ± 0.6                 | 6.0 ± 0.0                         | 5.3 ± 0.6                         | 5 ~ 6                           |
| <b>Blood</b>                | (-)                       | (-)                               | (-)                               | (-)                             |
| <b>Specific gravity</b>     | 1.028 ± 0.003             | 1.030 ± 0.000                     | 1.030 ± 0.000                     | N.A.                            |
| <b>Ketone (mm)</b>          | 5 ± 0                     | 2 ± 2                             | 5 ± 0                             | 2.5 ~ 10                        |
| <b>Bilirubin</b>            | (-)                       | (-)                               | (-)                               | (-)                             |
| <b>Glucose</b>              | (-)                       | (-)                               | (-)                               | (-)                             |

**Supplemental Table 3. Complete Blood Count by Automatic Hemacytometer (Veterinarian grade)**

|                                             | <i>Arf6<sup>f/+</sup></i> | <i>Arf6<sup>f/+</sup>;Tie2cre</i> | <i>Arf6<sup>f/-</sup>;Tie2cre</i> | <b>Normal range<br/>in mice</b> |
|---------------------------------------------|---------------------------|-----------------------------------|-----------------------------------|---------------------------------|
| <b>White blood cell (10<sup>3</sup>/μL)</b> | 4.5 ± 1.4                 | 5.6 ± 3.6                         | 4.5 ± 2.5                         | 2.6 ~ 10.1                      |
| <b>Granulocyte (10<sup>3</sup>/μL)</b>      | 0.6 ± 0.3                 | 0.6 ± 0.3                         | 1.1 ± 0.9                         | 0.4 ~ 2                         |
| <b>Monocyte (10<sup>3</sup>/μL)</b>         | 0.2 ± 0.2                 | 0.4 ± 0.1                         | 0.4 ± 0.2                         | 0 ~ 0.4                         |
| <b>Lymphocyte (10<sup>3</sup>/μL)</b>       | 3.6 ± 1.2                 | 4.7 ± 3.2                         | 3.0 ± 1.4                         | 1.3 ~ 8.4                       |
| <b>Hematocrit (%)</b>                       | 44.3 ± 3.6                | 42.8 ± 2.5                        | 42.4 ± 2.8                        | 32.8 ~ 48                       |
| <b>Hemoglobin (g/dL)</b>                    | 15.7 ± 1.3                | 14.7 ± 1.1                        | 14.5 ± 0.9                        | 10 ~ 16.1                       |
| <b>Platelet (10<sup>6</sup>/μL)</b>         | 262 ± 344                 | 273 ± 340                         | 261 ± 331                         | 250 ~ 1540                      |

**Supplemental Table 4. Antibodies for Immunofluorescence Staining**

| Antibody             | Vendor                    | Catalog# | Source            | Clone # | Dilution |
|----------------------|---------------------------|----------|-------------------|---------|----------|
| ARNO (Cyth2)         | Abcam                     | Ab2728   | Mouse mAb         | 10A12   | 1:20     |
| Clathrin Heavy Chain | Cell Signaling Technology | 2410     | Rabbit Polyclonal | n/a     | 1:100    |
| GEP100 (IQSEC1)      | Abcam                     | Ab122442 | Rabbit Polyclonal | n/a     | 1:25     |
| LAMP1                | Cell Signaling Technology | 9091     | Rabbit mAb        | D2D11   | 1:200    |
| RAB 5                | Cell Signaling Technology | 3547     | Rabbit mAb        | C8B1    | 1:200    |
| VEGFR2 (KDR)         | R&D Systems               | MAB3571  | Mouse mAb         | 89115   | 1:200    |

**Supplemental Table 5. Antibodies for Western Blotting**

| Antibody                 | Vendor                       | Catalog#      | Source            | Clone # |
|--------------------------|------------------------------|---------------|-------------------|---------|
| VEGFR2                   | Cell Signaling Technology    | 2479          | Rabbit mAb        | 55B11   |
| VEGFR2 pY951             | Cell Signaling Technology    | 4991          | Rabbit mAb        | 15D2    |
| VEGFR2 pY1059            | Cell Signaling Technology    | 3817          | Rabbit mAb        | D5A6    |
| VEGFR2 pY1175            | Cell Signaling Technology    | 2478          | Rabbit mAb        | 19A10   |
| VEGFR2 pY1212            | Cell Signaling Technology    | 2477          | Rabbit mAb        | 11A3    |
| pPLC $\gamma$            | Cell Signaling Technology    | 2821          | Rabbit Ab         | n/a     |
| PLC $\gamma$             | Cell Signaling Technology    | 5690          | Rabbit mAb        | D9H10   |
| pp38                     | Cell Signaling Technology    | 9211          | Rabbit Ab         | n/a     |
| p38                      | Cell Signaling Technology    | 9212          | Rabbit Ab         | n/a     |
| pERK1/2                  | Cell Signaling Technology    | 4377          | Rabbit mAb        | 197G2   |
| ERK1/2                   | Cell Signaling Technology    | 9107          | Mouse mAb         | 3A7     |
| pMARCKS                  | Cell Signaling Technology    | 8722          | Rabbit mAb        | D13E4   |
| MARCKs                   | Cell Signaling Technology    | 5607          | Rabbit mAb        | D88D11  |
| GAPDH                    | Cell Signaling Technology    | 5174          | Rabbit mAb        | D16H11  |
| ARF6                     | Cell Signaling Technology    | 5740          | Rabbit mAb        | D12G6   |
| Neuropilin               | Santa Cruz                   | Sc-7239       | Goat polyclonal   | n/a     |
| $\alpha$ Tubulin         | Cell Signaling Technology    | 3873          | Mouse mAb         | DM1A    |
| $\alpha$ -actinin        | Cell Signaling Technology    | 6487          | Rabbit mAb        | D6F6    |
| Caspase-3                | Cell Signaling Technology    | 9662          | Rabbit Ab         | n/a     |
| Caveolin pY14            | BD Transduction laboratories | 611338        | Mouse             | n/a     |
| Caveolin                 | Cell Signaling Technology    | 3238          | Rabbit Ab         | n/a     |
| ARNO                     | Abnova                       | H00009266-MO2 | Mouse mAb         | n/a     |
| GEP100                   | Sigma                        | HPA038144     | Rabbit polyclonal | n/a     |
| VEGFR2 (Sepharose beads) | Cell Signaling Technology    | 5168          | Rabbit mAb        | 55B11   |

**Supplemental Table 6. Table for siRNA Sequence**

| Target Gene Symbol | siRNA ID                    | Sense Sequence 5' -> 3' | Vendor |
|--------------------|-----------------------------|-------------------------|--------|
| Control            | AllStars Neg. Control siRNA | Proprietary             | QIAGEN |
| <i>ARF6</i>        | SI02757286                  | CAACGTGGAGACGGTGACTTA   | QIAGEN |
| <i>GEP100</i>      | SI03019408                  | CTGAAGGGTAGCAGTAATGAA   | QIAGEN |
| <i>ARNO</i>        | SI00061299                  | CGCUGUUGGUAAUCUUAUUTT   | QIAGEN |

**Supplemental Table 7. Table for Angiographic Sign Scores**

| <b>Angiographic Sign</b>                                                                             | <b>Scores</b> |
|------------------------------------------------------------------------------------------------------|---------------|
| Optic Disc Hyperfluorescence                                                                         |               |
| Normal staining of the scleral rim                                                                   | 0             |
| Staining of the disc with distinct margins:                                                          |               |
| Partial                                                                                              | 1             |
| Diffuse                                                                                              | 2             |
| <hr/>                                                                                                |               |
| <i>Pinpoint leaks</i>                                                                                |               |
| Limited area or at one focus                                                                         | 1             |
| Extensive                                                                                            | 2             |
| <hr/>                                                                                                |               |
| <i>Neovascularization</i>                                                                            |               |
| No hyperfluorescence                                                                                 | I             |
| Hyperfluorescence without leakage                                                                    | II            |
| Hyperfluorescence early to mid-transit with leakage                                                  | III           |
| Hyperfluorescence early or mid-transit with leakage extending beyond the borders of the treated area | IV            |
